# Supplementary figures and images for: Local analgesia of electroacupuncture is mediated by the recruitment of neutrophils and released β-endorphins
Source: PubMed Central journal article supplement — Pain. 2023 Apr 7;164(9):1965–75. doi: 10.1097/j.pain.0000000000002892 (PMC10436362; doi:10.1097/j.pain.0000000000002892), 2023-04-07

A

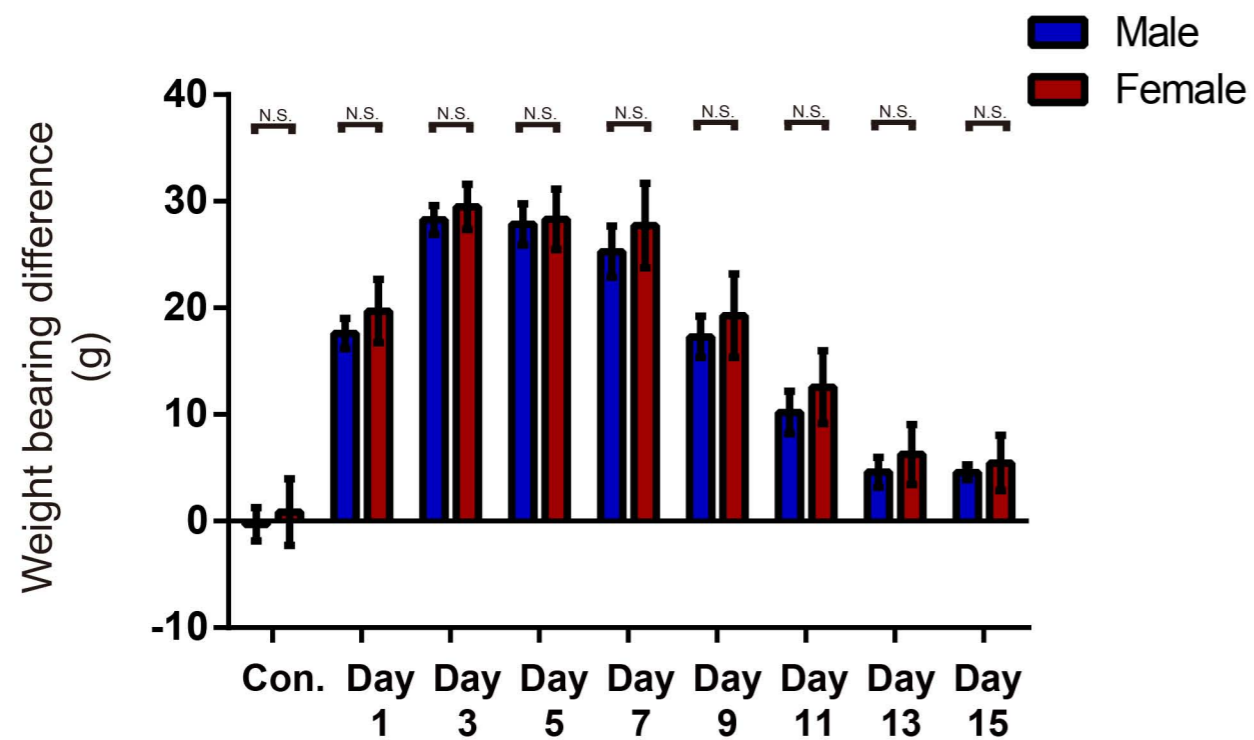

B

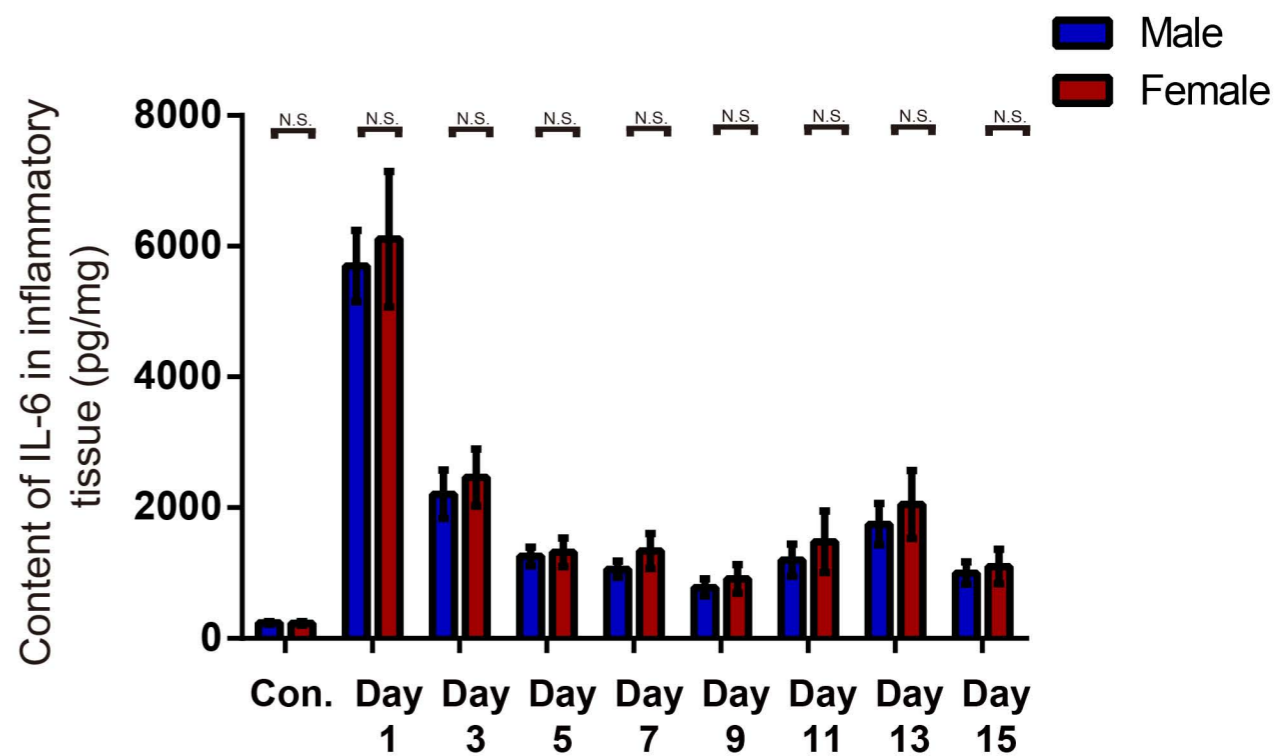

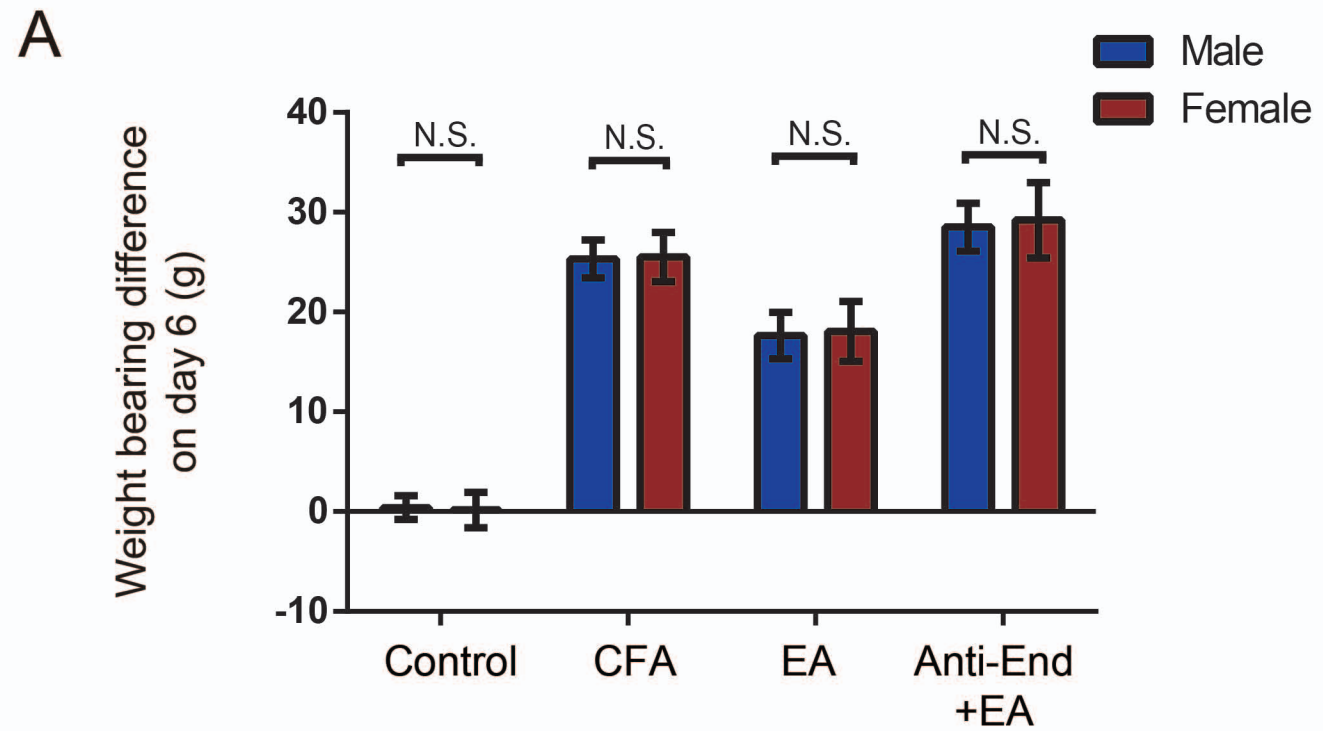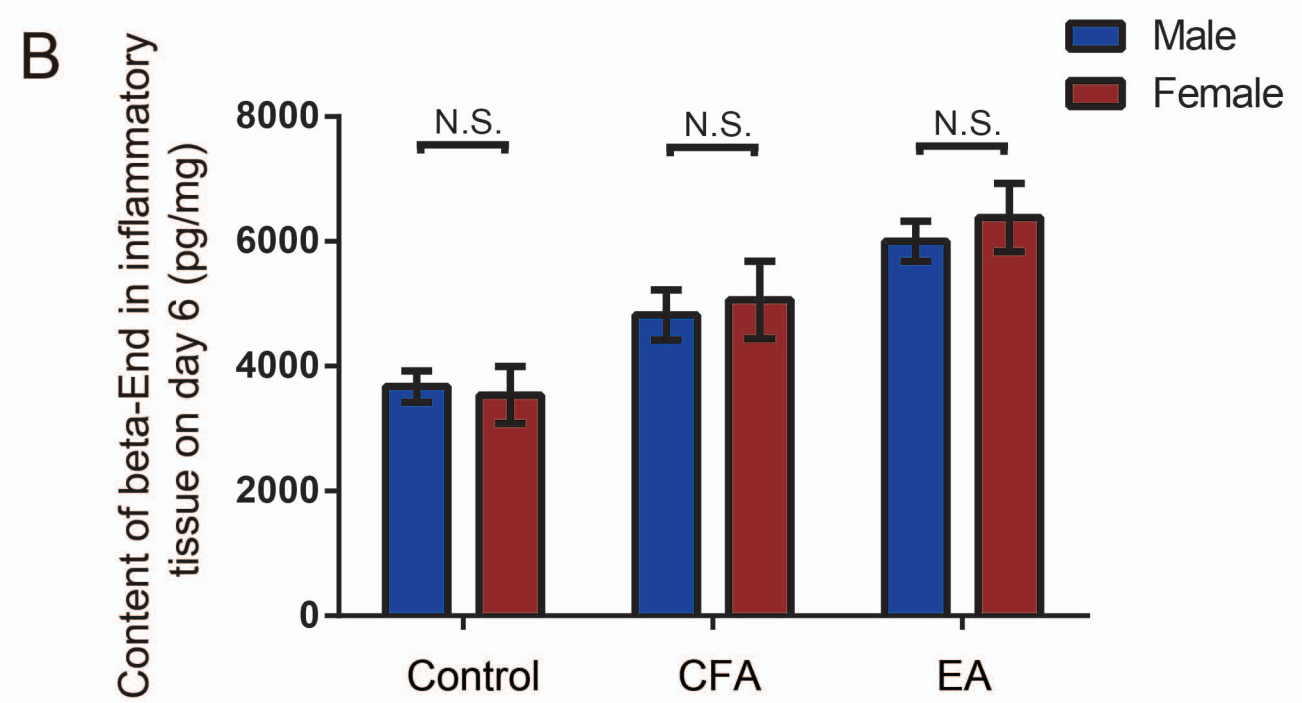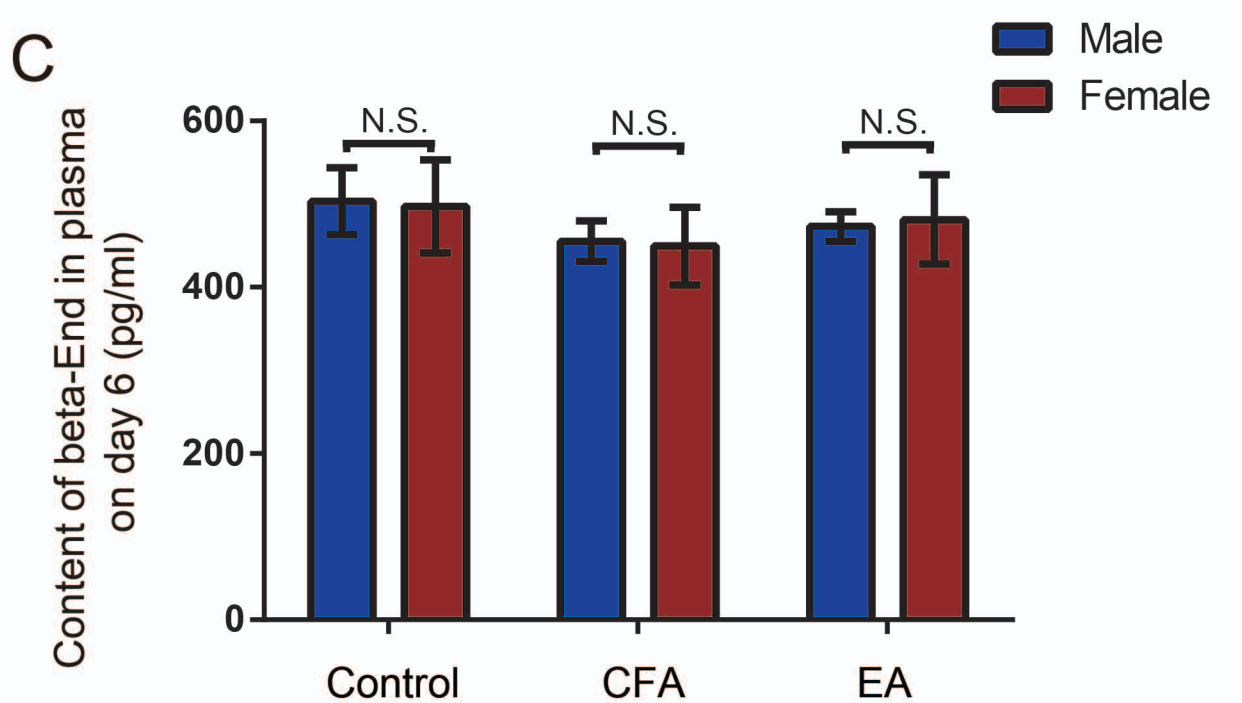

Supplement: jop-164-1965-s001.pdf [file jop-164-1965-s001.pdf]
